# Supplementary material
Source: publisher figshare collection journal article supplement (https://tandf.figshare.com/articles/dataset/_/1483473)
Supplement: Supplementary file 1 [file 5]

Archive with 6 entries (6 files):
- Supplemental Figure 3.pdf
- Supplemental Figure 4.pdf
- Supplemental Figure 2.pdf
- Supplemental File 2.pdf
- Supplemental Figure 1.pdf
- Supplemental File 1.pdf
