# Supplementary material
Source: publisher figshare collection journal article supplement (https://tandf.figshare.com/articles/dataset/_/1483473)
Supplement: Supplementary file 1 [file 5 › Supplemental Figure 3.pdf]

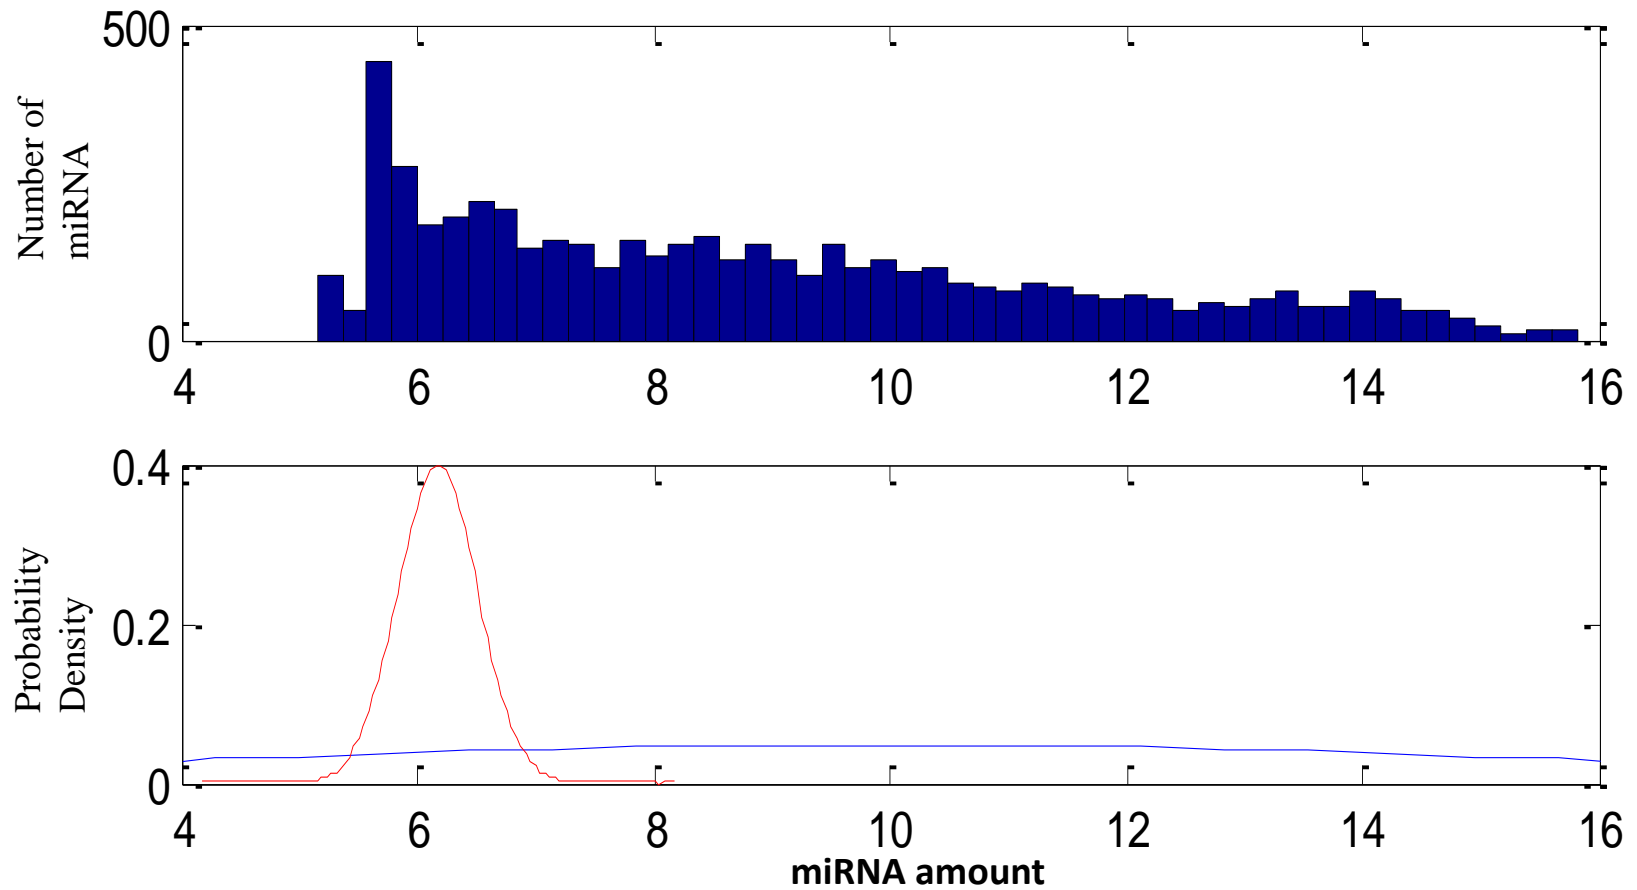

- Absent peak: mean=6.1747 / standard deviation=0.3361
- Present peak: mean=10.0062 / standard deviation=5.9298
- Cutoff = 6.9587 for False Discovery Rate (FDR) < 1%
