# Supplementary material
Source: publisher figshare collection journal article supplement (https://tandf.figshare.com/articles/dataset/_/1483473)
Supplement: Supplementary file 1 [file 5 › Supplemental File 1.pdf]

| Attribute         | miRBase<br>accession<br>Number | Alias                                       | miRBase<br>family | Log2 (RPM_QN) |
|-------------------|--------------------------------|---------------------------------------------|-------------------|---------------|
| <b>Cells</b>      |                                |                                             |                   |               |
| hsa-let-7a-3p     | MIMAT0004481                   | hsa-let-7a*;hsa-let-7a-3p;                  | MIPF0000002_2     | 7,245644319   |
| hsa-miR-101-3p    | MIMAT0000099                   | hsa-miR-101;hsa-miR-101-3p;                 | MIPF0000046_1     | 9,449754475   |
| hsa-miR-105-5p    | MIMAT0000102                   | hsa-miR-105;hsa-miR-105-5p;                 | MIPF0000074_1     | 7,657299733   |
| hsa-miR-1226-3p   | MIMAT0005577                   | hsa-miR-1226;hsa-miR-1226-3p;               | MIPF0000444_2     | 7,38193476    |
| hsa-miR-125b-2-3p | MIMAT0004603                   | hsa-miR-125b-2*;hsa-miR-125b-2-3p;          | MIPF0000033_2     | 7,144903135   |
| hsa-miR-1275      | MIMAT0005929                   | hsa-miR-1275;                               | MIPF0000674_1     | 9,538070408   |
| hsa-miR-1296-5p   | MIMAT0005794                   | hsa-miR-1296;hsa-miR-1296-5p;               | MIPF0000649_1     | 7,791535391   |
| hsa-miR-130b-5p   | MIMAT0004680                   | hsa-miR-130b*;hsa-miR-130b-5p;              | MIPF0000034_1     | 7,144903135   |
| hsa-miR-132-5p    | MIMAT0004594                   | hsa-miR-132*;hsa-miR-132-5p;                | MIPF0000065_1     | 7,879221816   |
| hsa-miR-1323      | MIMAT0005795                   | hsa-miR-1323;                               | MIPF0000617_1     | 8,603906352   |
| hsa-miR-149-5p    | MIMAT0000450                   | hsa-miR-149;hsa-miR-149-5p;                 | MIPF0000274_1     | 7,885323229   |
| hsa-miR-151a-3p   | MIMAT0000757                   | hsa-miR-151;hsa-miR-151-3p;hsa-miR-151a-3p; | MIPF0000057_2     | 7,945085668   |
| hsa-miR-196b-5p   | MIMAT0001080                   | hsa-miR-196b;hsa-miR-196b-5p;               | MIPF0000031_1     | 7,281193575   |
| hsa-miR-19b-1-5p  | MIMAT0004491                   | hsa-miR-19b-1*;hsa-miR-19b-1-5p;            | MIPF0000011_1     | 8,696462684   |
| hsa-miR-21-3p     | MIMAT0004494                   | hsa-miR-21*;hsa-miR-21-3p;                  | MIPF0000060_2     | 7,636262769   |
| hsa-miR-23a-5p    | MIMAT0004496                   | hsa-miR-23a*;hsa-miR-23a-5p;                | MIPF0000027_1     | 8,048455705   |
| hsa-miR-29c-5p    | MIMAT0004673                   | hsa-miR-29c*;hsa-miR-29c-5p;                | MIPF0000009_1     | 7,31567292    |
| hsa-miR-30b-3p    | MIMAT0004589                   | hsa-miR-30b*;hsa-miR-30b-3p;                | MIPF0000005_2     | 9,019906921   |
| hsa-miR-30e-3p    | MIMAT0000693                   | hsa-miR-30e-3p;hsa-miR-30e*;hsa-miR-30e-3p; | MIPF0000005_2     | 8,811926697   |
| hsa-miR-32-3p     | MIMAT0004505                   | hsa-miR-32*;hsa-miR-32-3p;                  | MIPF0000069_2     | 7,144903135   |
| hsa-miR-32-5p     | MIMAT0000090                   | hsa-miR-32;hsa-miR-32-5p;                   | MIPF0000069_1     | 8,3721767     |
| hsa-miR-330-3p    | MIMAT0000751                   | hsa-miR-330;hsa-miR-330-3p;                 | MIPF0000200_2     | 8,436319119   |
| hsa-miR-339-3p    | MIMAT0004702                   | hsa-miR-339-3p;                             | MIPF0000193_2     | 8,000397767   |

|                  |              |                                           |               |             |
|------------------|--------------|-------------------------------------------|---------------|-------------|
| hsa-miR-33a-3p   | MIMAT0004506 | hsa-miR-33a*;hsa-miR-33a-3p;              | MIPF0000070_2 | 8,413331672 |
| hsa-miR-362-5p   | MIMAT0000705 | hsa-miR-362;hsa-miR-362-5p;               | MIPF0000209_1 | 8,4882471   |
| hsa-miR-362-3p   | MIMAT0004683 | hsa-miR-362-3p;                           | MIPF0000209_2 | 8,2887892   |
| hsa-miR-374a-5p  | MIMAT0000727 | hsa-miR-374;hsa-miR-374a;hsa-miR-374a-5p; | MIPF0000288_1 | 7,883361875 |
| hsa-miR-455-3p   | MIMAT0004784 | hsa-miR-455-3p;                           | MIPF0000129_2 | 7,962035248 |
| hsa-miR-502-3p   | MIMAT0004775 | hsa-miR-502-3p;                           | MIPF0000139_2 | 8,558692503 |
| hsa-miR-504-5p   | MIMAT0002875 | hsa-miR-504;hsa-miR-504-5p;               | MIPF0000437_1 | 7,879221816 |
| hsa-miR-509-3-5p | MIMAT0004975 | hsa-miR-509-3-5p;                         | MIPF0000130_1 | 7,582888935 |
| hsa-miR-514b-5p  | MIMAT0015087 | hsa-miR-514b-5p;                          | MIPF0000130_1 | 7,952873693 |
| hsa-miR-551b-5p  | MIMAT0004794 | hsa-miR-551b*;hsa-miR-551b-5p;            | MIPF0000360_1 | 8,021450276 |
| hsa-miR-625-3p   | MIMAT0004808 | hsa-miR-625*;hsa-miR-625-3p;              | MIPF0000534_2 | 7,38193806  |
| hsa-miR-708-5p   | MIMAT0004926 | hsa-miR-708;hsa-miR-708-5p;               | MIPF0000397_1 | 7,399227844 |
| hsa-miR-7-1-3p   | MIMAT0004553 | hsa-miR-7-1*;hsa-miR-7-1-3p;              | MIPF0000022_2 | 8,350604181 |
| hsa-miR-769-3p   | MIMAT0003887 | hsa-miR-769-3p;                           | MIPF0000727_2 | 8,482204865 |
| hsa-miR-887-3p   | MIMAT0004951 | hsa-miR-887;hsa-miR-887-3p;               | MIPF0000554_2 | 9,048719084 |
| hsa-miR-940      | MIMAT0004983 | hsa-miR-940;                              | MIPF0000540_1 | 8,156413694 |
| hsa-miR-96-5p    | MIMAT0000095 | hsa-miR-96;hsa-miR-96-5p;                 | MIPF0000072_1 | 7,705774587 |

## Apoptotic Bodies

|                 |              |                                             |               |             |
|-----------------|--------------|---------------------------------------------|---------------|-------------|
| hsa-miR-34a-3p  | MIMAT0004557 | hsa-miR-34a*;hsa-miR-34a-3p;                | MIPF0000039_2 | 7,921312733 |
| hsa-miR-664a-3p | MIMAT0005949 | hsa-miR-664;hsa-miR-664-3p;hsa-miR-664a-3p; | MIPF0000300_2 | 7,437968403 |
| hsa-miR-4443    | MIMAT0018961 | hsa-miR-4443;                               | #N/A          | 7,437968403 |

## Exosomes

|                 |              |                                |               |             |
|-----------------|--------------|--------------------------------|---------------|-------------|
| hsa-miR-199a-3p | MIMAT0000232 | hsa-miR-199a*;hsa-miR-199a-3p; | MIPF0000040_2 | 8,769644162 |
| hsa-miR-139-5p  | MIMAT0000250 | hsa-miR-139;hsa-miR-139-5p;    | MIPF0000117_1 | 10,34784919 |
| hsa-miR-214-3p  | MIMAT0000271 | hsa-miR-214;hsa-miR-214-3p;    | MIPF0000062_2 | 9,588673082 |
| hsa-miR-223-3p  | MIMAT0000280 | hsa-miR-223;hsa-miR-223-3p;    | MIPF0000067_2 | 12,90230179 |

|                 |              |                                           |               |             |
|-----------------|--------------|-------------------------------------------|---------------|-------------|
| hsa-miR-124-3p  | MIMAT0000422 | hsa-miR-124a;hsa-miR-124;hsa-miR-124-3p;  | MIPF0000021_2 | 8,23546573  |
| hsa-miR-142-3p  | MIMAT0000434 | hsa-miR-142-3p;                           | MIPF0000084_2 | 10,61190792 |
| hsa-miR-143-3p  | MIMAT0000435 | hsa-miR-143;hsa-miR-143-3p;               | MIPF0000094_2 | 9,966668333 |
| hsa-miR-144-3p  | MIMAT0000436 | hsa-miR-144;hsa-miR-144-3p;               | MIPF0000093_2 | 11,9451539  |
| hsa-miR-145-5p  | MIMAT0000437 | hsa-miR-145;hsa-miR-145-5p;               | MIPF0000079_1 | 11,88439521 |
| hsa-miR-150-5p  | MIMAT0000451 | hsa-miR-150;hsa-miR-150-5p;               | MIPF0000197_1 | 10,60212583 |
| hsa-miR-155-5p  | MIMAT0000646 | hsa-miR-155;hsa-miR-155-5p;               | MIPF0000157_1 | 7,533918333 |
| hsa-miR-200a-3p | MIMAT0000682 | hsa-miR-200a;hsa-miR-200a-3p;             | MIPF0000019_2 | 7,698555013 |
| hsa-miR-376c-3p | MIMAT0000720 | hsa-miR-368;hsa-miR-376c;hsa-miR-376c-3p; | MIPF0000091_2 | 9,593662166 |
| hsa-miR-369-3p  | MIMAT0000721 | hsa-miR-369;hsa-miR-369-3p;               | MIPF0000018_2 | 8,370548396 |
| hsa-miR-379-5p  | MIMAT0000733 | hsa-miR-379;hsa-miR-379-5p;               | MIPF0000126_1 | 8,36008037  |
| hsa-miR-342-3p  | MIMAT0000753 | hsa-miR-342;hsa-miR-342-3p;               | MIPF0000190_2 | 10,76922537 |
| hsa-miR-335-5p  | MIMAT0000765 | hsa-miR-335;hsa-miR-335-5p;               | MIPF0000196_1 | 8,25606434  |
| hsa-miR-451a    | MIMAT0001631 | hsa-miR-451;hsa-miR-451a;                 | MIPF0000148_1 | 14,0555093  |
| hsa-miR-486-5p  | MIMAT0002177 | hsa-miR-486;hsa-miR-486-5p;               | MIPF0000220_1 | 11,97819307 |
| hsa-miR-432-5p  | MIMAT0002814 | hsa-miR-432;hsa-miR-432-5p;               | MIPF0000211_1 | 8,23546573  |
| hsa-miR-494-3p  | MIMAT0002816 | hsa-miR-494;hsa-miR-494-3p;               | MIPF0000018_2 | 9,863144773 |
| hsa-miR-495-3p  | MIMAT0002817 | hsa-miR-495;hsa-miR-495-3p;               | MIPF0000110_2 | 7,964281574 |
| hsa-miR-144-5p  | MIMAT0004600 | hsa-miR-144*;hsa-miR-144-5p;              | MIPF0000093_1 | 8,237594458 |
| hsa-miR-486-3p  | MIMAT0004762 | hsa-miR-486-3p;                           | MIPF0000220_2 | 8,941701551 |
