# Supplementary material
Source: publisher figshare collection journal article supplement (https://tandf.figshare.com/articles/dataset/_/1483473)
Supplement: Supplementary file 1 [file 5 › Supplemental File 2.pdf]

| Exosome-specific miRNAs | Target mRNAs                                                                                                                                                                                                                                                                                                                                                                                                                                                                                                                                                                                                                                                                                                                                                                                                                                                                                                                                                                                                                                                                                                                                                                                                                                                                                                                                                                                           |
|-------------------------|--------------------------------------------------------------------------------------------------------------------------------------------------------------------------------------------------------------------------------------------------------------------------------------------------------------------------------------------------------------------------------------------------------------------------------------------------------------------------------------------------------------------------------------------------------------------------------------------------------------------------------------------------------------------------------------------------------------------------------------------------------------------------------------------------------------------------------------------------------------------------------------------------------------------------------------------------------------------------------------------------------------------------------------------------------------------------------------------------------------------------------------------------------------------------------------------------------------------------------------------------------------------------------------------------------------------------------------------------------------------------------------------------------|
| hsa-miR-124-3p          | ADIPOR2, AHR, AR, BACE1, CCL2, CDK2, CDK4, CDK6, CEBPA, CTDSP1, E2F6, EFNB1, ELK3, EZH2, FXN, HMGA1, IL6R, IQGAP1, ITGB1, LAMC1, MECP2, MTPN, NFKBIZ, NR3C1, NR3C2, PEA15, RDH10, RELA, ROCK2, SLC16A1, SMYD3, SNAI2, VIM,                                                                                                                                                                                                                                                                                                                                                                                                                                                                                                                                                                                                                                                                                                                                                                                                                                                                                                                                                                                                                                                                                                                                                                             |
| hsa-miR-139-5p          | FOS, IGF1R                                                                                                                                                                                                                                                                                                                                                                                                                                                                                                                                                                                                                                                                                                                                                                                                                                                                                                                                                                                                                                                                                                                                                                                                                                                                                                                                                                                             |
| hsa-miR-142-3p          | ARNTL, PROM1, RAC1                                                                                                                                                                                                                                                                                                                                                                                                                                                                                                                                                                                                                                                                                                                                                                                                                                                                                                                                                                                                                                                                                                                                                                                                                                                                                                                                                                                     |
| hsa-miR-143-3p          | AKT1, BCL2, DNMT3A, FHIT, FNDC3B, FSCN1, HK2, HRAS, KRAS, MACC1, MAPK7, MDM2, MMP13, MYO6, SERPINE1                                                                                                                                                                                                                                                                                                                                                                                                                                                                                                                                                                                                                                                                                                                                                                                                                                                                                                                                                                                                                                                                                                                                                                                                                                                                                                    |
| hsa-miR-144-3p          | FGA, FGB, FGG, MTOR, NFE2L2, NOTCH1, PLAG1, PTEN                                                                                                                                                                                                                                                                                                                                                                                                                                                                                                                                                                                                                                                                                                                                                                                                                                                                                                                                                                                                                                                                                                                                                                                                                                                                                                                                                       |
| hsa-miR-144-5p          | <i>Not available</i>                                                                                                                                                                                                                                                                                                                                                                                                                                                                                                                                                                                                                                                                                                                                                                                                                                                                                                                                                                                                                                                                                                                                                                                                                                                                                                                                                                                   |
| hsa-miR-145-5p          | ABHD17C, ABRACL, ADAM17, AKR1B10, ALDH3A1, ALPPL2, AP1G1, APH1A, ARL6IP5, BNIP3, C11orf65, C11orf9, CBF, CCDC43, CDH2, CDK4, CEP19, CLINT1, CPEB4, CTGF, DDX17, DFFA, DTD1, EIF4E, ERG, F11R, FAM3C, FAM45A, FLI1, FSCN1, FZD7, GMFB, GOLM1, HDAC2, HLT, IFNB1, IGF1R, ILK, IRS1, IRS2, ITGB8, KLF4, KREMEN1, LYPLA2, MAP2K6, MDM2, MEST, MIXL1, MMP1, MMP12, MMP14, MTMR14, MUC1, MYC, MYO5A, MYO6, NANOG, NDRG2, NDUFA4, NEDD9, NIPSNAP1, NRAS, PAK4, PARP8, PHF17, PIGF, PODXL, POU5F1, PPM1D, PPP3CA, PTP4A2, ROBO2, RTKN, SERINC5, SERPINE1, SOCS7, SOX2, SRGAP1, STAT1, SWAP70, TIRAP, TMEM9B, TMOD3, TPM3, TPRG1, TSPAN6, VEGFA, YES1                                                                                                                                                                                                                                                                                                                                                                                                                                                                                                                                                                                                                                                                                                                                                           |
| hsa-miR-150-5p          | CXCR4, EGR2, EP300, FLT3, IGF2, MYB, NOTCH3, P2RX7, TP53, VEGFA, ZEB1,                                                                                                                                                                                                                                                                                                                                                                                                                                                                                                                                                                                                                                                                                                                                                                                                                                                                                                                                                                                                                                                                                                                                                                                                                                                                                                                                 |
| hsa-miR-155-5p          | ACTR2, AGO4, AGTR1, ANAPC16, APAF1, APC, ARFIP1, ARID2, ARL15, ARL6IP5, ARMC2, Arntl, ARPC3, BACH1, BCL6, BRPF3, C16orf62, C17orf80, C3orf18, CAB39, CARD11, CARHSP1, CBR4, CCDC41, CCDC82, CD68, CDC40, Cebpb, CEP41, CHD9, CIAPIN1, CLUAP1, Csf1r, CSNK1A1, Cux1, CYP2U1, CYR61, DCUN1D2, DET1, DHX40, E2F2, EDN1, ETS1, EXOSC2, FAM135A, FAM177A1, FAM199X, FAM91A1, FGF7, FLI1, FOXO3, GABARAPL1, GATM, GCFC2, GCSAM, GOLT1B, GPM6B, HAL, HBP1, HERC4, Hif1a, HIVEP2, ICAM1, IFNGR1, IGJ, IKBKE, IL13RA1, IL17RB, IL8, INPP5D, INPP5F, INTS6, Jarid2, JUN, KBTBD2, KDM3A, KIAA0430, KLHL5, KRAS, KRCC1, LCORL, LDOC1, LIN7C, LNX2, LRIF1, LRRC59, MAP3K10, MAP3K14, MASTL, MATR3, MBNL3, MCM8, MECP2, MEF2A, MEIS1, MITF, MLH1, MORC3, MPP5, MRPL18, MRPS27, MSH2, MSH6, MSI2, MYB, MYBL1, MYD88, MYO10, MYO1D, NARS, NFATC2IP, NOS3, NOVA1, OLR1, PAK2, PALD1, PBRM1, PCDH9, PDLIM5, PHC2, PHF14, PHF17, Picalm, PKIA, PKN2, PLS1, POLE3, PRKAR1A, RAB11FIP2, RAC1, RAPGEF2, RBAK, RHEB, RHOA, RUNX2, SAP30L, SDCBP, SECISBP2, SELE, Sfp1, SKI, Sla, SLC33A1, SLC35F2, SMAD1, SMAD2, SMAD3, SMAD4, SMAD5, SMARCA4, SOCS1, SPI1, SSX2IP, TAB2, TAF5L, TBC1D14, TBC1D8B, TBCA, TCF12, TLE4, TM6SF1, TOMM20, TP53INP1, TRAK1, TRIP13, TSHZ3, TSPAN14, TTF1, UBQLN1, UBT2, UPF2, UQCFS1, VPS18, WBP1L, WEE1, WHSC1L1, WWC1, YWHAZ, ZIC3, ZNF248, ZNF254, ZNF28, ZNF493, ZNF561, ZNF611, ZNF652, ZNF83 |
| hsa-miR-199a-3p         | CAV2, CD44, FUT4, MAPK1, MAPK9, MET, SMARCA2                                                                                                                                                                                                                                                                                                                                                                                                                                                                                                                                                                                                                                                                                                                                                                                                                                                                                                                                                                                                                                                                                                                                                                                                                                                                                                                                                           |

|                 |                                                                                                                                                                                                              |
|-----------------|--------------------------------------------------------------------------------------------------------------------------------------------------------------------------------------------------------------|
| hsa-miR-200a-3p | BAP1, CCNE2, CTNNB1, DLX5, ELMO2, ERBB2IP, GDAP1, HOXB5, KEAP1, KLF11, KLHL20, MAPK14, PTPRD, RASSF2, RIN2, SEPT7, SHC1, SIP1, SMAD2, SMAD3, TCF7L1, TRAPPC2P1, VAC14, WASF3, WDR37, YAP1, ZEB1, ZEB2, ZFPM2 |
| hsa-miR-214-3p  | ASF1B, ATF4, BCL2L2, CTNNB1, EZH2, MAP2K3, MAPK8, PLXNB1, POU4F2, PSMD10, PTEN, QKI, SRGAP1, SRGAP2, TP53, TWIST1, XBP1                                                                                      |
| hsa-miR-223-3p  | ARTN, CHUK, E2F1, EPB41L3, FBXW7, FOXO1, HSP90B1, IGF1R, LIF, LMO2, MEF2C, NFIA, NFIX, PARP1, RHOB, SCARB1, SLC2A4, SP3, STMN1                                                                               |
| hsa-miR-335-5p  | ARPC5L, BIRC5, BRCA1, Daam1, EPN2, ID4, IGF1R, LRG1, MAPK1, MERTK, MYC, PTPRN2, RASA1, RB1, RUNX2, SOX4, SP1, TNC, UBE2F                                                                                     |
| hsa-miR-342-3p  | BMP7, DNMT1, GEMIN4                                                                                                                                                                                          |
| hsa-miR-369-3p  | <i>Not available</i>                                                                                                                                                                                         |
| hsa-miR-376c-3p | ACVR1C, IGF1R                                                                                                                                                                                                |
| hsa-miR-379-5p  | IL11                                                                                                                                                                                                         |
| hsa-miR-432-5p  | <i>Not available</i>                                                                                                                                                                                         |
| hsa-miR-451a    | ABCB1, AKT1, BCL2, CAB39, MIF, MMP2, MMP9, MYC, RAB14, TMED7                                                                                                                                                 |
| hsa-miR-486-3p  | <i>Not available</i>                                                                                                                                                                                         |
| hsa-miR-486-5p  | <i>Not available</i>                                                                                                                                                                                         |
| hsa-miR-494-3p  | ARNTL, BCL2L11, PTEN                                                                                                                                                                                         |
| hsa-miR-495-3p  | MEIS1, PBX3                                                                                                                                                                                                  |
