# Supplementary material
Source: publisher figshare collection journal article supplement (https://tandf.figshare.com/articles/dataset/_/1483473)

# MELANOMA

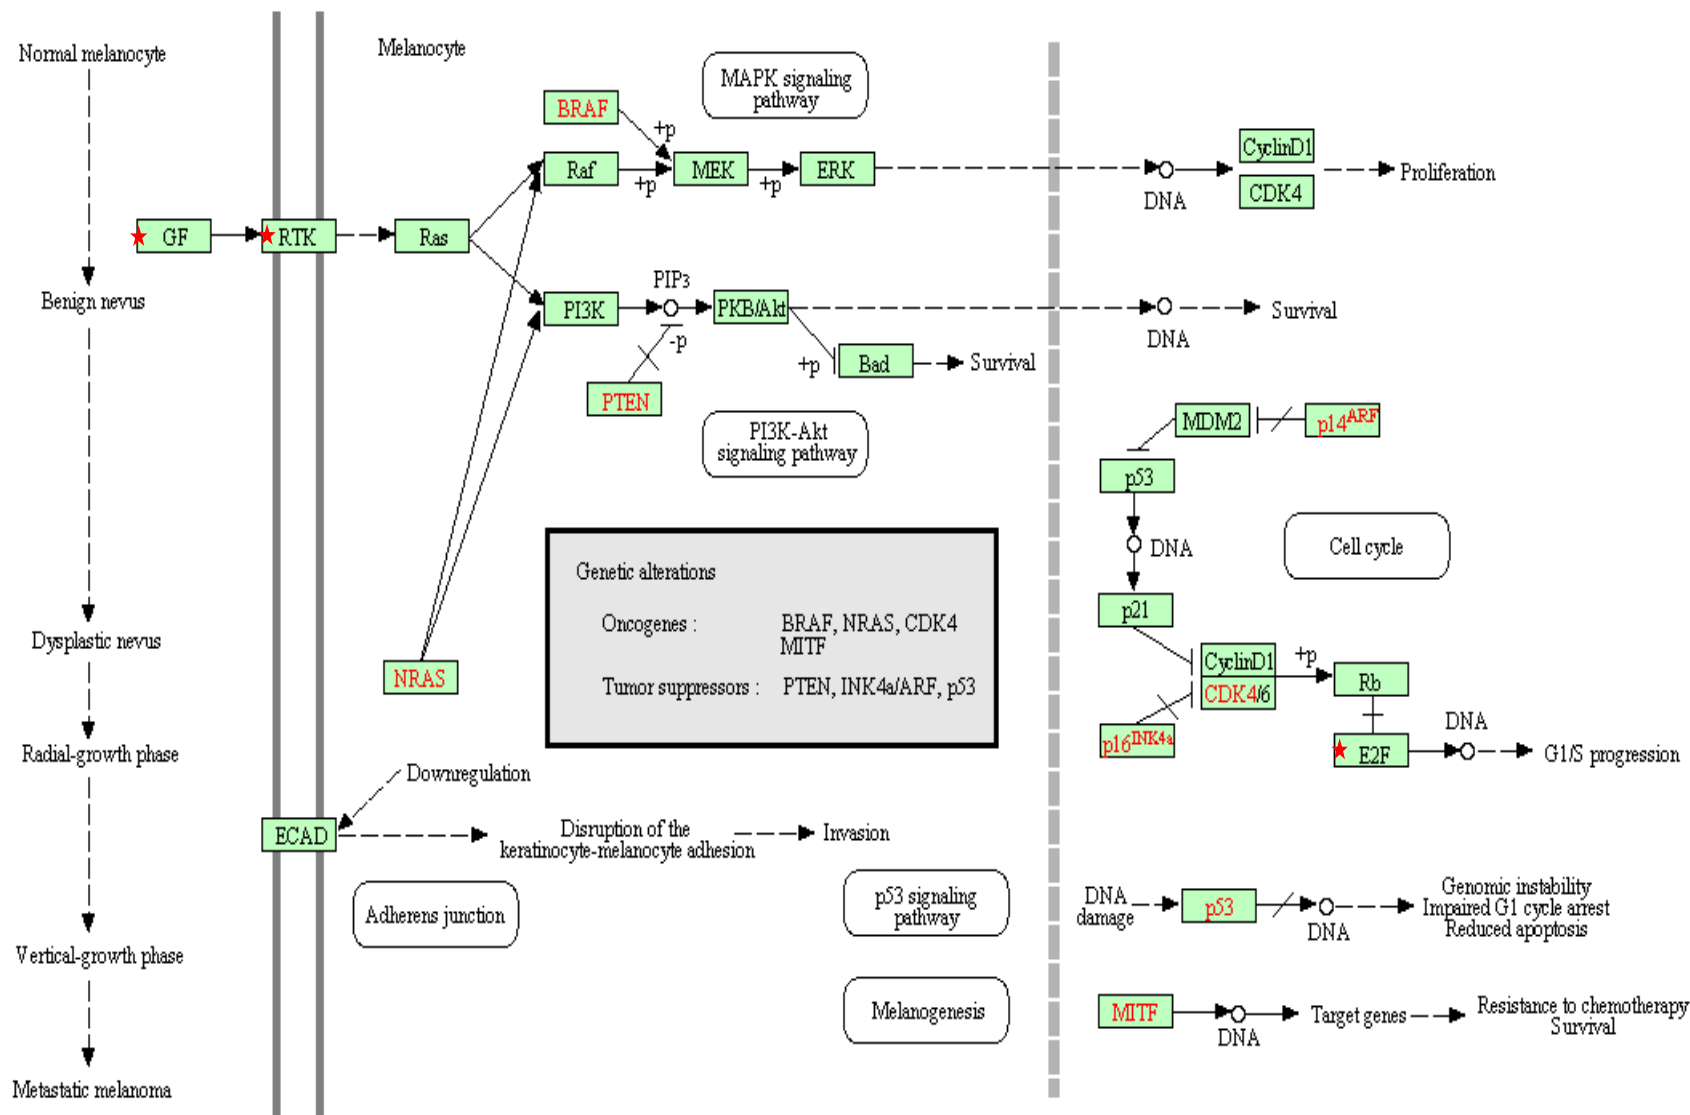

Supplement: Supplementary file 1 [file 5 › Supplemental Figure 4.pdf]

A)

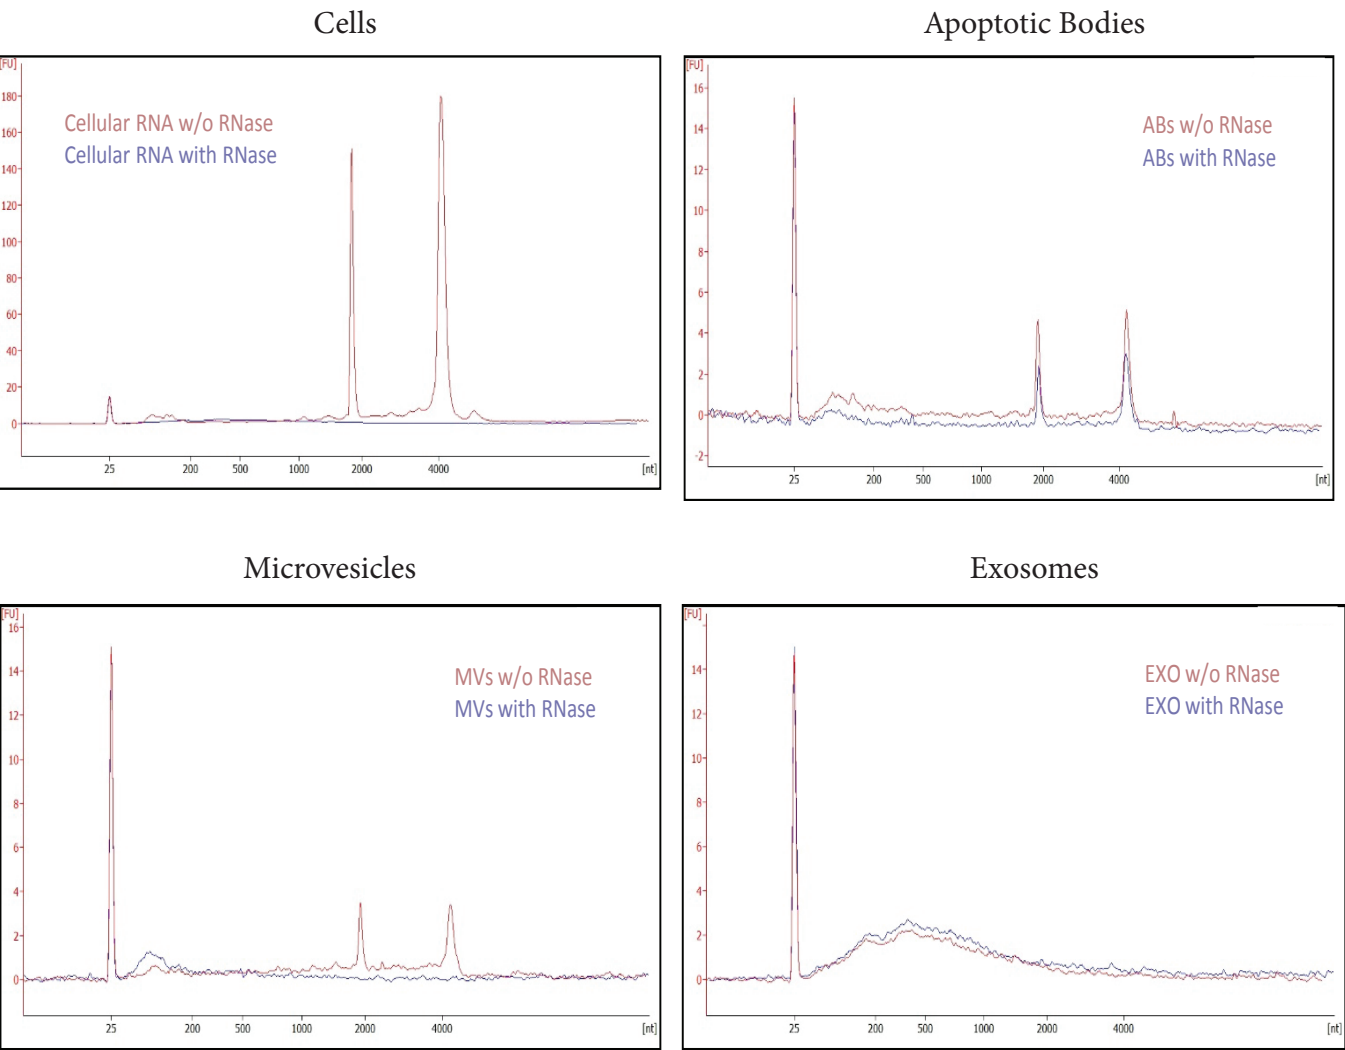

B)

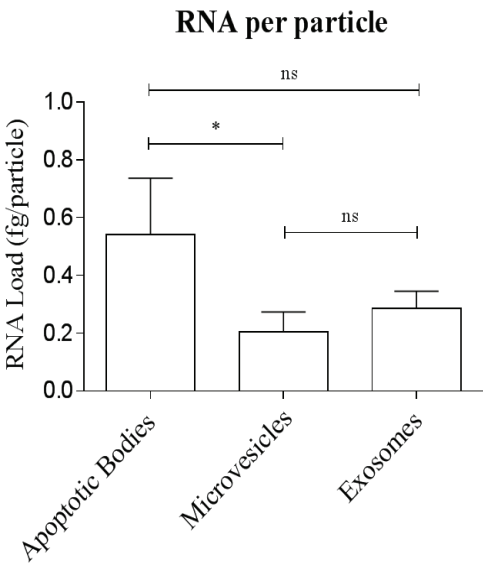

Supp Fig 2

Supplement: Supplementary file 1 [file 5 › Supplemental Figure 2.pdf]

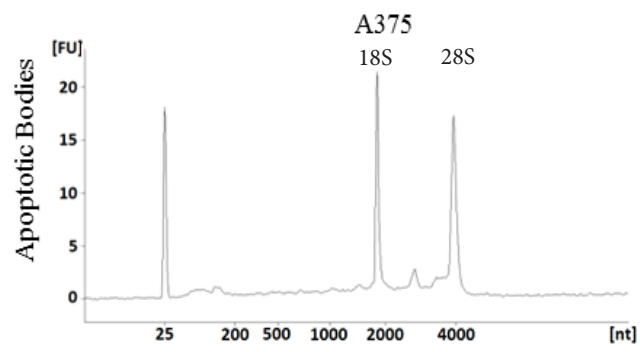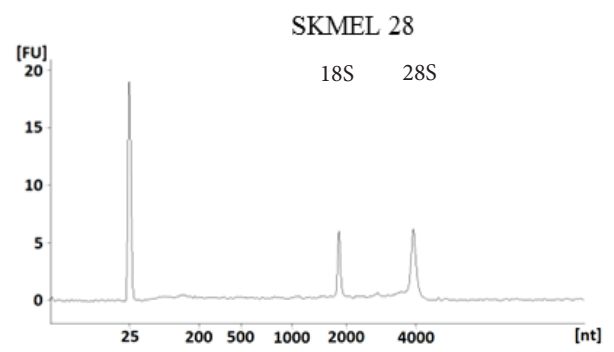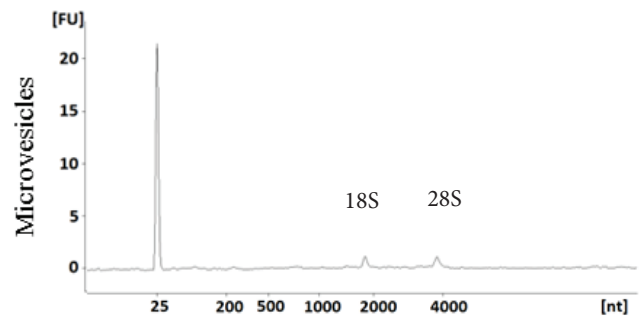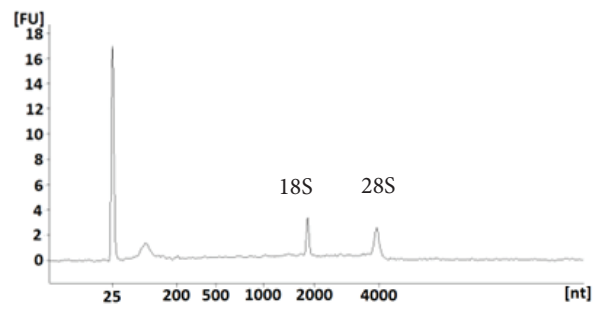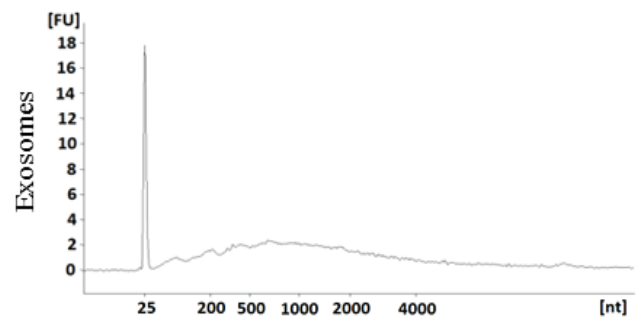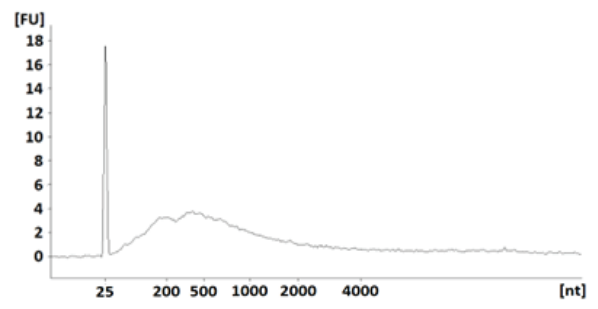

Supplement: Supplementary file 1 [file 5 › Supplemental Figure 1.pdf]
